# Supplementary material
Source: PubMed Central journal article supplement (PMC3710181)
Supplement: supp_JOP.2012.000811_DS_JOP.2012.000811.pdf [file supp_JOP.2012.000811_DS_JOP.2012.000811.pdf]

## Supplemental File 1

### D. Garfield:

Medical Oncology fellowship, U. Of Minnesota; boards '73; practiced med/onc in Israel with H. Brenner, '71-2; in private practice, Denver CO., 72-02. Founding member of what later became U.S. Oncology [chair of Lung Committee]; Community co-Chair, Thoracic Committee, ECOG, '89-'02. Practicing med/onc with H. Brenner since 2010 in Shanghai.

2010: Visiting Prof. at Chest and Zhongshan Hospitals, consultant at Pulmonary and Tumor Hospitals, all in Shanghai. Has private breast cancer clinic at Ruijin Hospital, public hospital, in Shanghai [only such license of China]. Consultant at Jiao Tong Medical Center Key Laboratory, Shanghai. 2012: co-authored 7 publications with Shanghai authors

### H. Brenner:

Chief of Oncology at Sheba Medical Center, Israel 35 years. Attending Oncologist New York Presbyterian Hospital; trained at MSKCC, Royal Marsden Hospital, Newcastle-on-Tyne Regional Oncology Center; visiting Prof., Brown U., Rhode Island, Princess Margaret Hospital, Toronto Can.

### Lucy Lu:

Trained at Hong Kong Adventist Hospital, Ammed Cancer Center, Shanghai Hospital No. 10; worked at Ruijin Hospital, now at Shanghai Red Leaf Hospital, all in Shanghai.
